# Supplementary material for: Transcriptional and Post-transcriptional Mechanisms Limit Heading Date 1 (Hd1) Function to Adapt Rice to High Latitudes
Source: PLoS Genet. 2017 Jan 9;13(1):e1006530. doi: 10.1371/journal.pgen.1006530 (PMC5221825; doi:10.1371/journal.pgen.1006530)
Supplement: S1 Table — The table is a summary of the genotypes of the varieties used in this study, including the mobile element in the Hd1 promoter and the ΔK337 polymorphism originally identified in Volano. For a complete overview of the genotypes, a summary of the data reported in Gomez-Ariza et al. is also shown on the right of the table. An X indicates the presence of a non-functional allelic variant. n.t., not tested. The 102 genotypes carrying functional LD floral inhibitors are indicated in yellow. (XLSX) [file pgen.1006530.s009.xlsx]

## Sheet: Supplementary table 1
					Hd1 (non-functional alleles)						PRR37 (n-f a)			Ghd7 (n-f alleles)			Ghd8 (n-f alleles)			EL1 (n-f alleles)
					Hd1 (non-functional alleles)	(x706)	(x834)	(x861)	(x1053)	(x1072)	(x1515)	(x2113)	(x2129)	-	(x157)	(x618)	(x93)	(x323)	(x451)	(x476)	(x991)
					1bp deletion	43bp deletion	2bp deletion	Tp	4bp deletion	C->T; R358@	8bp deletion	C->T, Q705@	T->C, L710P	no allele	G->T; E53@	C->A, Y206@	19bp deletion	1bp deletion	8bp deletion	G->C; G159A	G->A; A331T		SUMMARY
			Mobile element in Hd1 promoter		Type 2	HS66 (se1)	Kasalath (hd1)	Ginbouzu (x1534)	Type 7	Type 12	PRR37-1a	PRR37-Kasalath	PRR37-2a	Ghd7-0	jap-G; H0 (S_1629)	-	Type 9	Type 8	Type 7	Type 2	Type 3	ΔK337	NON-FUNCTIONAL (number of varieties)
					Takahashi et al., 2009	Yano et al., 2000	Yano et al., 2000	Fujino et al., 2010	Takahashi et al., 2009	Takahashi et al., 2009	Koo et al., 2013	Murakami et al., 2005	Koo et al., 2013	Xue et al., 2008	Lu et al., 2012	-	Wei et al., 2010	Wei et al., 2010	Wei et al., 2010	Kwon et al., 2014	Kwon et al., 2014		Hd1	PRR37	Ghd7	Ghd8
					0	15	65	2	1	2	1	0	6	14	1	4	54	10	0	0	1		81	5	18	63
	ACCESSION	COUNTRY
	104 UPLA	Argentina					X						n.t.								n.t.		X	n.t.
	3 C N 5	Bulgaria					X											X					X			X
	32 UPLA	Argentina	X														X									X
	63 UPLA	Argentina					X																X
	64 UPLA	Argentina	X															X								X
	66 UPLA	Argentina					X											X					X			X
	68 A UPLA	Argentina					X											X					X			X
	75 UPLA	Argentina					X																X
	77 UPLA	Argentina					X																X
	79 UPLA	Argentina					X																X
	80 UPLA	Argentina					X																X
	91 UPLA	Argentina					X																X
	A 201	USA					X																X
	ADAIR	USA					X																X
	AGOSTANO	Italy																				X
	AKITAKOMACHI	Japan				X																	X
	ALAN	USA					X									X							X		X
	ALBADA	Spain															X									X
	ALINANO C	France					X																X
	ALMARELO	Portugal	X
	ALPE	Italy				X											X						X			X
	ALPHA	Italy	X														X									X
	ANSEATICO	Italy																				X
	ANTONI	Bulgaria	X											X											X
	ARBORIO	Italy																				X
	ARIETE	Italy	X
	ARLESIENNE	France																				X
	ARROZ DA TERRA DE NÓS ESCUROS	Portugal	X											X											X
	AUGUSTO	Italy					X							X			X						X		X	X
	AUZGUSTA	Hungary											X	X								X		X	X
	BAJANG x ALLORIO 199-65	Italy	X
	BALDO 363	Italy	X
	BALILLA	Italy															X									X
	BALILLONE R 253	Italy															X									X
	BARAGGIA	Italy	X
	BARU	Australia					X																X
	BEIRAO	Portugal	X											X			X								X	X
	BELLE PATNA	USA					X																X
	BETIS	Spain															X									X
	BISER 1	Bulgaria	X																			X
	BLUE BONNET	USA					X																X
	BOMBILLA	Spain															X									X
	BOMBON	Spain
	BORA	Italy	X
	BRAVO	Italy																				X
	CALENDAL	France	X
	CALMOCHI 101	USA				X																	X
	CAMPINO	Portugal	X
	CAPATAZ	Spain
	CARINA	Bulgaria																				X
	CARIOCA	Italy					X							X									X		X
	CARNAROLI	Italy	X
	CENTAURO	Italy								X							X						X			X
	CERVO	Italy					X																X
	CHIPKA	Bulgaria	X
	CIGALON	France	X														X									X
	CINIA 40	Chile	X
	CLOT	Spain															X									X
	COCODRIE	USA					X																X
	CRESO	Italy					X																X
	CRISTAL	France
	CT 10	Colombia	X
	CT 13	Colombia	X
	CT 23	Colombia	X
	CT 36	Colombia	X
	CT 50	Colombia	X										X											X
	CT 58	Colombia	X										X											X
	D.S.I.	Portugal	X														X									X
	DELTA	France	X
	DIMITRA	Greece					X																X
	DIXIEBELLE	USA					X							X									X		X
	DORELLA	Italy															X									X
	DOSEL	Spain					X										X						X			X
	DRAGO	Italy					X																X
	DREW	USA
	EAN 1	Portugal	X
	ELBA	Italy																				X
	EOLO	Italy					X									X							X		X
	ERCOLE	Italy	X
	ESCARLATE	Portugal	X
	EUROPA	Italy	X
	EUROSE	Italy																				X
	EUROSIS	Italy				X																	X
	FAISCA	Portugal	X
	FAMILIA 181	Portugal																				X
	FLIPPER	Italy	X
	FRAGRANCE	Italy					X											X					X			X
	FRANCES	Spain				X																	X
	GALILEO	Italy				X																	X
	GEMA	Spain					X										X						X			X
	GHIBLI	Italy					X							X									X		X
	GIADA	Italy					X																X
	GITANO	Italy	X														X									X
	GLADIO	Italy					X										X						X			X
	GOOLARAH	Australia					X																X
	GRALDO	Italy					X																X
	GRITNA	Italy	X														X									X
	HAREM	Portugal	X										n.t.								n.t.			n.t.
	HARRA	Australia															X									X
	HONDURAS	Spain					X																X
	IAC 26	Brazil					X																X
	IAC 32-52	Brazil					X																X
	IBO 380-33	Portugal															X									X
	IBO 400	Portugal	X
	IBO 828-63	Portugal	X
	ICE	Italy	X
	ILANG ILANG	Korea					X																X
	IRRAL	Portugal	X														X									X
	ITALICO	Italy	X										n.t.		n.t.		X			n.t.	n.t.			n.t.	n.t.	X
	ITALPATNA 48	Italy																				X
	JACINTO	USA					X																X
	JAMBA SEL 1	Portugal	X
	JUBILIENI	Bulgaria	X														X									X
	KARNAK	Italy	X
	KING	Italy					X																X
	KORAL	Italy																				X
	KYEEMA	Australia					X																X
	L 204	USA					X						n.t.										X	n.t.
	L 205	USA					X																X
	LA FERLA	Italy
	LABORATÓRIO 4	Portugal					X																X
	LACASSINE	USA
	LADY WRIGHT	USA	X																			X
	LAGRUE	USA					X																X
	LEDA	Spain															X									X
	LIDO	Italy				X																	X
	LORD	Italy																				X
	LOTO	Italy																				X
	LUNA	Spain
	LUSITO IRRADIADO 859-85-2	Portugal	X
	LUXOR	Italy	X
	M 17	Bulgaria					X																X
	M 203	USA												X											X
	M 204	USA																X								X
	MAIORAL	Portugal	X
	MANTOVA	Italy	X
	MARATELLI	Italy	X
	MARENY	Spain	X														X									X
	MAYBELLE	USA					X									X							X		X
	MEJANES 2	France	X											X											X
	MESTRE	Italy	X
	MIARA	Italy	X											X											X
	MIDA	Italy					X																X
	MILEV 21	Bulgaria	X														X									X
	MUGA	Portugal																				X
	NANO	Italy					X																X
	NEMBO	Italy	X
	NIBBIO	Italy	X
	NILO	Italy															X									X
	OLCENENGO	Italy															X									X
	ONDA	Italy															X									X
	OPALE	Italy																				X
	ÓSCAR	Portugal					X										X						X			X
	OTA	Portugal	X
	P 6 AFRICANO	Mozambique				X																	X
	PADANO	Italy															X									X
	PANCAS	Portugal	X														X									X
	PANDA	Italy					X							X									X		X
	PECOS	USA						X														X	X
	PEGONIL	Spain	X
	PELDE	Australia					X																X
	PERLA	Italy				X																	X
	PETRONIO	Italy															X									X
	PIEMONTE	Italy	X
	PIERINA MARCHETTI	Italy	X
	PIERROT	Italy	X														X									X
	PLOVDIV 22	Bulgaria	X														X									X
	PLOVDIV 24	Bulgaria																				X
	PLUS	Italy					X																X
	PRECOCE 6	Italy	X														X									X
	PRECOCE ROSSI	Italy	X
	PRECOZ 2 F A	Argentina	X											X											X
	PREVER	Italy					X																X
	RAJADO	Portugal	X											X											X
	RAZZA 77	Italy															X					X				X
	REAL	Portugal	Heterozygous
	REDI	Italy																				X
	REGINA	Portugal					X											X					X			X
	RESTAURAÇÃO	Portugal	X
	REXMONT	USA					X																X
	RIBE 253	Italy	X
	RIO	Italy	X														X									X
	RIVA	Italy	X
	RIZZOTTO 51-1	Italy																				X
	ROMA	Italy																				X
	RONCAROLO	Italy																				X
	ROTUNDUS	Hungary	X
	ROVUMA	Portugal	X
	RPC 12	China				X																	X
	RUBI	Portugal	X
	RUBINO	Italy	X
	S 102	USA
	S 102-2	Portugal	X
	S 201 (THAIPERLA)	USA															X									X
	SANT'ANDREA	Italy															X					X				X
	SAEDINENIE	Bulgaria	X										X				X							X		X
	SAFARI	Portugal	X
	SAGRES	Portugal	X
	SALOIO	Portugal	X
	SAMBA	Italy					X								n.t.								X		n.t.
	SANDOCA	Portugal	X
	SARIA	Bulgaria	X
	SAVIO	Italy																				X
	SBS 148	Spain															X									X
	SCUDO	Italy																				X
	SELENIO	Italy				X																	X
	SELN 244 A6-20	Australia															X									X
	SENIA	Spain															X									X
	SESIA	Italy																				X
	SETANTUNO	Portugal																				X
	SHANGHAI	China															X									X
	SHSS 381	Spain															X									X
	SILLA	Italy															X					X				X
	SIR 12 4	Spain									X						X							X		X
	SIS R215	Italy					X																X
	SLAVA	Bulgaria	X																			X
	SMERALDO	Italy																				X
	SOLLANA	Spain	X
	SOURE	Portugal								X													X
	SR 113	Spain	X
	STIRPE A FEUILLAGE VIOLET	France	X
	STRELLA	Italy						X															X
	SUPER	Portugal																				X
	T 757	India	X														X									X
	TARRISO	Italy					X																X
	TEJO	Italy	X
	TEXMONT	USA					X									X							X		X
	THAIBONNET	USA					X																X
	TIMICH 108	Romania				X							X				X				X		X	X		X
	TOPAZIO	Portugal	X														X									X
	ULLAL	Spain																X								X
	VALTEJO	Portugal					X																X
	VARY LAVA 51 A	Madagascar																				X
	VARY LAVA B	Madagascar																				X
	VENERIA	Italy																				X
	VIALONE 190	Italy	X
	VIALONE NANO	Italy	X
	VICTORIA	Argentina				X																	X
	VOLANO	Italy																				X
	YRL 196	Australia							X									X					X			X
	YRM 6-2	Australia																X								X
	ZENA	Italy				X																	X
					set delle 102		dei totali:
					64 hanno il trasp		93 hanno trasposone
